# Supplementary material
Source: PubMed Central journal article supplement (PMC6644137)
Supplement: ao8b02446_si_001.pdf [file ao8b02446_si_001.pdf]

---

Supplementary Information

**Graphene-like MoS<sub>2</sub> nanosheets on carbon fabrics as high performance binder-free electrode for supercapacitors and Li-ion batteries**

Hong Yin<sup>1,#</sup>, Yuan Liu<sup>1,#</sup>, Neng Yu<sup>2</sup>, Hong-Qing Qu<sup>1</sup>, Zhitian Liu<sup>3</sup>, Renzhi Jiang<sup>1</sup>,  
Chong Li<sup>1,\*</sup>, Ming-Qiang Zhu<sup>1,\*</sup>

1. Wuhan National Laboratory for Optoelectronics (WNLO), School of Optics and Electronic Information, Huazhong University of Science and Technology, Wuhan 430074, China

2. Jiangxi Province Key Laboratory of Polymer Micro/Nano Manufacturing and Devices, School of Chemistry, Biology and Materials Science, East China University of Technology Nanchang, 330013, P. R. China

3. School of Materials Science & Technology Wuhan Institute of Technology, Wuhan, 4302054, China

\*Corresponding Authors

E-mail: mqzhu@hust.edu.cn; chongli@hust.edu.cn

#These authors contributed equally to the work.

Charge/discharge profiles of MoS<sub>2</sub>/carbon fabrics

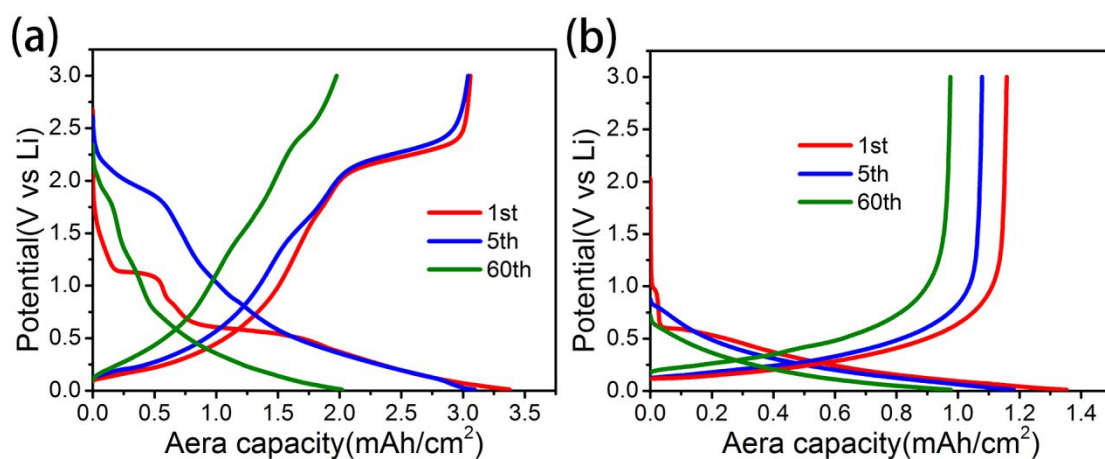

**Figure S1.** Charge/discharge profiles of MoS<sub>2</sub>/carbon fabrics (a) and pure carbon fabrics (b).

Cycling performance of MoS<sub>2</sub>/carbon fabrics electrode

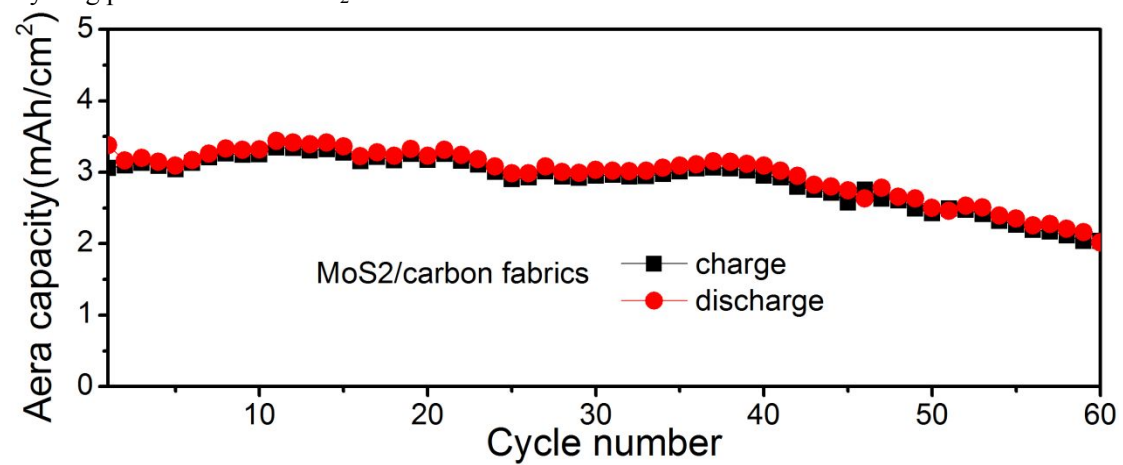

**Figure S2.** Cycling performance of MoS<sub>2</sub>/carbon fabrics electrode at the current density of 0.2mA/cm<sup>2</sup>. The charge/discharge potential range is 0.01 to 3V.

Charge/discharge profiles of pure carbon fabrics

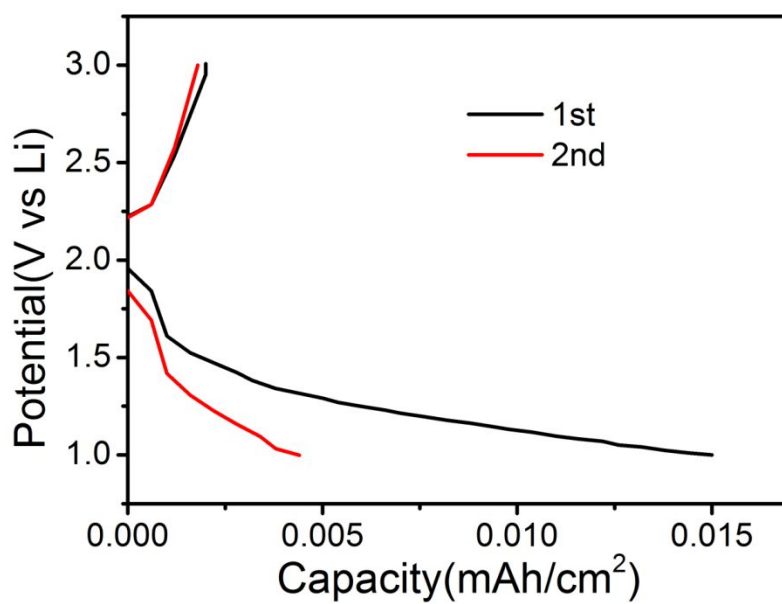

**Figure S3.** Charge/discharge profiles of pure carbon fabrics between 1 V to 3V.
